# Supplementary material
Source: Springer Nature journal article supplement (https://www.springermedizin.de/resource/supplementary/12885_2014_4952_MOESM2_ESM.pdf/9467806)

Primary tumors N=196

Median FAK score=4.00

### Distribution of TUMOR

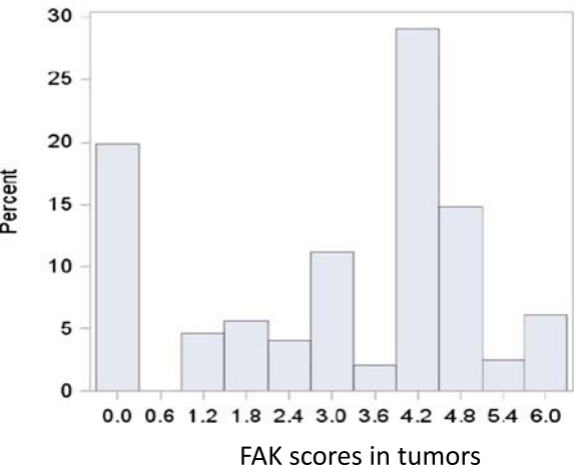

Supplement: MOESM2 [file 9467806]
